# Supplementary material
Source: publisher site journal article supplement (https://www.dovepress.com/get_supplementary_file.php?f=482310.docx)
Supplement: Supplementary file 1 [file get_supplementary_file.php]

Supplementary Material

**Table S1：**The list of 29 flavonoids in 6 flavonoid classes.

| **Anthocyanidins** | Cyanidin |
| --- | --- |
|  | Delphinidin |
|  | Malvidin |
|  | Pelargonidin |
|  | Peonidin |
|  | Petunidin |
| **Flavonols** | Isorhamnetin |
|  | Kaempferol |
|  | Myricetin |
|  | Quercetin |
| **Flavanones** | Eriodictyol |
|  | Hesperetin |
|  | Naringenin |
| **Flavones** | Apigenin |
|  | Luteolin |
| **Isoflavones** | Daidzein |
|  | Genistein |
|  | Glycitein |
| **Flavan-3-ols** | (-)-Epicatechin |
|  | (-)-Epicatechin 3-gallate |
|  | (-)-Epigallocatechin |
|  | (-)-Epigallocatechin 3-gallate |
|  | (+)-Catechin |
|  | (+)-Gallocatechin |
|  | Theaflavin |
|  | Theaflavin-3,3'-digallate |
|  | Theaflavin-3'-gallate |
|  | Theaflavin-3-gallate |
|  | Thearubigins |

**Table S2:** Cutoff values for grouping in all flavonoids.

| **Variable** | **Cut-off values** | | | |
| --- | --- | --- | --- | --- |
| **Q1** | **Q2** | **Q3** | **Q4** |
| Anthocyanidins | [0, 0.575] | (0.575, 4.355] | (4.355, 20.448] | (20.448, 328.675] |
| Flavonols | [0.485, 7.432] | (7.432, 13.088] | (13.088, 23.456] | (23.456, 137.42] |
| Flavanones | [0, 0.095] | (0.095, 1.335] | (1.335, 20.523] | (20.523, 272.36] |
| Flavones | [0,0.24] | (0.24, 0.585] | (0.585, 1.176] | (1.176, 71.23] |
| Isoflavones | [0, 0] | [0.005, 0.015] | (0.015, 0.088] | (0.088, 153.695] |
| Flavan-3-ols | [0 6.632] | (6.632, 18.148] | (18.148, 212.281] | (212.281, 3508.495] |
| Total flavonoids | [1.04, 30.059] | (30.059, 78.665] | (78.665, 269.77] | (269.77, 3648.1] |

**Table S3**: Stratified analysis of dietary flavonoid intake on LE8 score in age subgroups. The model was adjusted for gender, race, smoking status, alcohol consumption, education, BMI, diabetes, hypertension, and hyperlipidemia.

| **Variable** | **Age < 60 (n=296)** | | | |  | **Age ≥ 60 (n=800)** | | | | ***P-int*** |
| --- | --- | --- | --- | --- | --- | --- | --- | --- | --- | --- |
| **Q1** | **Q2 β (95%CI)** | **Q3 β (95%CI)** | **Q4 β (95%CI)** |  | **Q1** | **Q2 β (95%CI)** | **Q3 β (95%CI)** | **Q4 β (95%CI)** |
| Anthocyanidins | ref | 2.90 (-0.81, 6.61) | 6.30 (3.19, 9.41) | 5.49 (2.12, 8.86) |  | ref | 2.40 (-1.06, 5.86) | 3.79 (0.39, 7.19) | 6.61 (2.53, 10.69) | 0.37 |
| Flavonols | ref | -0.62 (-4.27, 3.03) | 3.17 (-0.54, 6.89) | 4.25 (1.42, 7.09) |  | ref | 3.32 (0.81, 5.83) | 4.26 (1.99, 6.54) | 2.88 (0.59, 5.16) | 0.22 |
| Flavanones | ref | 1.39 (-2.55, 5.33) | 0.10 (-4.26, 4.46) | 2.71 (-1.58, 7.00) |  | ref | 0.84 (-2.74, 4.42) | 2.21 (-1.60, 6.01) | 3.63 (-0.42, 7.67) | 0.75 |
| Flavones | ref | 0.25 (-3.88, 4.38) | 2.78 (-0.33, 5.89) | 5.26 (1.83, 8.69) |  | ref | 2.52 (0.17, 4.88) | 3.43 (0.44, 6.43) | 4.81 (2.25, 7.38) | 0.59 |
| Isoflavones | ref | 2.26 (-1.36, 5.87) | 4.30 (0.05, 8.55) | 3.97 (0.50, 7.44) |  | ref | 1.23 (-1.08, 3.54) | 2.37 (-0.44, 5.18) | -0.37 (-3.43, 2.69) | 0.31 |
| Flavan-3-ols | ref | 3.59 (-0.71, 7.88) | 3.86 (-0.89, 8.61) | 2.94 (-0.19, 6.07) |  | ref | 0.89 (-2.31, 4.09) | 0.81 (-2.32, 3.94) | 1.05 (-1.92, 4.01) | 0.46 |
| Total flavonoids | ref | 3.90 (-0.62, 8.42) | 5.18 (0.22, 10.15) | 3.84 (0.32, 7.36) |  | ref | 3.00 (-0.14, 6.13) | 4.08 (0.11, 8.05) | 2.79 (-0.65, 6.24) | 0.94 |

Note: The model was adjusted for gender, race, smoking status, alcohol consumption, education, BMI, diabetes, hypertension, and hyperlipidemia.

**Table S4**: Stratified analysis of dietary flavonoid intake on LE8 score in gender subgroups. The model was adjusted for age, race, smoking status, alcohol consumption, education, BMI, diabetes, hypertension, and hyperlipidemia.

| **Variable** | **Female (n= 571)** | | | |  | **Male (n= 525)** | | | | ***P-int*** |
| --- | --- | --- | --- | --- | --- | --- | --- | --- | --- | --- |
| **Q1** | **Q2 β (95%CI)** | **Q3 β (95%CI)** | **Q4 β (95%CI)** |  | **Q1** | **Q2 β (95%CI)** | **Q3 β (95%CI)** | **Q4 β (95%CI)** |
| Anthocyanidins | ref | 2.38( -0.38, 5.15) | 5.29(2.35, 8.24) | 7.36(4.24, 10.47) |  | ref | 2.99(-0.19, 6.16) | 3.81(0.08, 7.54) | 4.68(-0.37, 9.73) | 0.63 |
| Flavonols | ref | 1.52(-1.01, 4.05) | 4.96(2.09, 7.84) | 2.84(0.46, 5.22) |  | ref | 2.50(-1.95, 6.94) | 2.44(-0.66, 5.55) | 3.88(1.30, 6.45) | 0.38 |
| Flavanones | ref | 1.53(-2.40, 5.45) | 2.98(-0.36, 6.31) | 3.42(-0.34, 7.19) |  | ref | -0.35(-4.28, 3.58) | -0.84(-5.01, 3.34) | 3.16(-1.88, 8.20) | 0.38 |
| Flavones | ref | -0.20( -2.93, 2.52) | 2.58(-0.08, 5.24) | 4.59(1.63, 7.56) |  | ref | 3.69(-1.29, 8.67) | 3.60(-0.73, 7.93) | 5.63(1.79, 9.47) | 0.22 |
| Isoflavones | ref | 1.01(-1.30, 3.33) | 2.74(0.05, 5.43) | 2.32( -0.77, 5.42) |  | ref | 3.27(0.11, 6.43) | 3.75(0.48, 7.02) | 0.87(-2.06, 3.79) | 0.46 |
| Flavan-3-ols | ref | 3.14(0.18, 6.10) | 2.92(-0.04, 5.87) | 3.25(0.34, 6.15) |  | ref | 0.22(-3.99, 4.43) | 0.48(-4.17, 5.14) | -0.45(-3.92, 3.01) | 0.48 |
| Total flavonoids | ref | 2.39(-0.36, 5.14) | 3.90(1.01, 6.79) | 3.19(0.20, 6.18) |  | ref | 4.81(0.31, 9.31) | 5.21(0.07, 10.35) | 3.17(-0.99, 7.33) | 0.54 |

Note： The model was adjusted for age, race, smoking status, alcohol consumption, education, BMI, diabetes, hypertension, and hyperlipidemia.

**Table S5:** Stratified analysis of dietary flavonoid intake on LE8 score in race subgroups. The model was adjusted for age, gender, smoking status, alcohol consumption, education, BMI, diabetes, hypertension, and hyperlipidemia.

| **Variable** | **Non-Hispanic White (n= 788)** | | | |  | **Other race (n= 308)** | | | | ***P-int*** |
| --- | --- | --- | --- | --- | --- | --- | --- | --- | --- | --- |
| **Q1** | **Q2 β (95%CI)** | **Q3 β (95%CI)** | **Q4 β (95%CI)** |  | **Q1** | **Q2 β (95%CI)** | **Q3 β (95%CI)** | **Q4 β (95%CI)** |
| Anthocyanidins | ref | 1.83(-1.30, 4.97) | 4.12(0.96, 7.28) | 5.94(2.42, 9.47) |  | ref | 4.05(1.44, 6.65) | 6.4(1.77,11.04) | 7.56(3.98,11.14) | 0.79 |
| Flavonols | ref | 1.05(-1.13, 3.23) | 3.13(1.14, 5.12) | 2.44(0.58, 4.31) |  | ref | 6.34(2.60, 10.09) | 4.52(0.94, 8.09) | 4.64(0.52, 8.77) | 0.17 |
| Flavanones | ref | 1.15(-1.55, 3.86) | 1.24(-2.29, 4.76) | 3.63(0.15, 7.10) |  | ref | 1.86(-1.95, 5.67) | 3.93(0.94, 6.93) | 1.81(-1.92, 5.54) | 0.33 |
| Flavones | ref | 1.31(-1.72, 4.34) | 2.88(-0.02, 5.77) | 4.84(2.00, 7.68) |  | ref | 1.32(-2.89, 5.54) | 3.77(0.54, 6.99) | 4.55(1.46, 7.64) | 0.92 |
| Isoflavones | ref | 0.87(-1.36, 3.09) | 2.62(0.13, 5.11) | 0.98(-1.67, 3.63) |  | ref | 2.59(-0.93, 6.10) | 5.75(2.74, 8.77) | 3.68(0.20, 7.16) | 0.80 |
| Flavan-3-ols | ref | 2.03(-1.17, 5.22) | 1.32(-2.26, 4.90) | 1.80(-0.68, 4.27) |  | ref | 2.24(-1.12, 5.61) | 4.38(0.91, 7.86) | 1.80(-2.92, 6.53) | 0.27 |
| Total flavonoids | ref | 2.72(-0.50, 5.93) | 3.93(0.04, 7.83) | 3.08(0.19, 5.97) |  | ref | 7.19(4.17, 10.21) | 6.83(3.58, 10.09) | 3.45(-1.23, 8.14) | 0.20 |

Note： The model was adjusted for age, gender, smoking status, alcohol consumption, education, BMI, diabetes, hypertension, and hyperlipidemia.

**Table S6:** Mediators in the association between dietary anthocyanidin intake and LE8 in cancer survivors.

| **Mediators** | **ACME (Direct effect)** | |  | **ADE (Indirect effect)** | |  | **Total Effect** | |  | **Proportion mediated** | |
| --- | --- | --- | --- | --- | --- | --- | --- | --- | --- | --- | --- |
| **Estimate** | ***P*** |  | **Estimate** | ***P*** |  | **Estimate** | ***P*** |  | **Estimate** | ***P*** |
| **NEUT** | <0.001 | 0.042 |  | 0.027 | <0.001 |  | 0.028 | <0.001 |  | 0.030 | 0.042 |
| **BMI** | 0.014 | 0.002 |  | 0.024 | 0.002 |  | 0.039 | <0.001 |  | 0.370 | 0.002 |
